# Supplementary material for: Understanding the interplay between the crystal structure and charge transport in alloyed lead-free perovskites
Source: Royal Society of Chemistry journal article supplement (doi:10.1039/d1se01124c), 2021-01-01
Supplement: d1se01124c1.pdf [file d1se01124c1.pdf]

## Supplementary Information

### Understanding the Interplay between Crystal Structure and Charge Transport in Alloyed Lead-free Perovskites

Aleksandra G. Boldyreva,<sup>a\*</sup> Shijing Sun<sup>b</sup>, Polly J. Pierone<sup>c</sup>, Filipp Talalaev<sup>d</sup>, Janak Thapa<sup>b</sup>, Meng-ju Sher<sup>c</sup>, Noor Titan Putri Hartono<sup>b</sup>, Tonio Buonassisi<sup>b</sup>, Pavel A. Troshin<sup>d</sup>, and Keith J. Stevenson<sup>a</sup>

<sup>a</sup> Skolkovo Institute of Science and Technology Nobel street 3, Moscow, 143026, Russia

<sup>b</sup> Massachusetts Institute of Technology, Boston, Massachusetts, USA

<sup>c</sup> Wesleyan University, Middletown, Connecticut, USA

<sup>d</sup> Institute for Problems of Chemical Physics of the Russian Academy of Sciences (ICP RAS), Semenov prospect 1, Chernogolovka, 142432, Moscow region, Russia

\* Corresponding author: [aleksandra.boldyreva@skolkovotech.ru](mailto:aleksandra.boldyreva@skolkovotech.ru)

Table S1. Average P, R, D characteristics of the studied lateral devices (symbols in brackets show standard deviation). Bandgaps were estimated using Tauc plot, \* denotes for indirect bandgap.

| Material                                                                                                   | Dimensionality | Bandgap (ass) eV | 405 nm               |                        |                                        | 532 nm                |                         |                                      | 650 nm                |                       |                               |
|------------------------------------------------------------------------------------------------------------|----------------|------------------|----------------------|------------------------|----------------------------------------|-----------------------|-------------------------|--------------------------------------|-----------------------|-----------------------|-------------------------------|
|                                                                                                            |                |                  | P %                  | R mA/W                 | D Jones                                | P %                   | R mA/W                  | D Jones                              | P %                   | R mA/W                | D Jones                       |
| MA <sub>3</sub> BiI <sub>2.9</sub>                                                                         | 0D             | 1.91*            | 51.4<br>(8.2)        | 2.8<br>(0.0925)        | 1.8·10 <sup>8</sup><br>(0.0925)        | 2.15<br>(48.8)        | 0.0041<br>(48.8)        | 2.4·10 <sup>5</sup><br>(48.8)        | -                     | -                     | -                             |
| MA <sub>3</sub> (Bi <sub>0.6</sub> Sb <sub>0.4</sub> )I <sub>2.9</sub>                                     | 0D             | 1.89*            | 25<br>(8.2)          | 1.3<br>(0.0925)        | 8.4·10 <sup>7</sup><br>(0.0925)        | 3.9<br>(48.8)         | 0.0067<br>(48.8)        | 4.1·10 <sup>5</sup><br>(48.8)        | -                     | -                     | -                             |
| <b>MA<sub>3</sub>SbI<sub>2.9</sub></b>                                                                     | <b>0D</b>      | <b>1.91*</b>     | <b>314<br/>(8.2)</b> | <b>19<br/>(0.0925)</b> | <b>1.2·10<sup>9</sup><br/>(0.0925)</b> | <b>8.0<br/>(48.8)</b> | <b>0.13<br/>(48.8)</b>  | <b>2.6·10<sup>6</sup><br/>(48.8)</b> | <b>4.6<br/>(63.2)</b> | <b>0.4<br/>(0.38)</b> | 7.4·10 <sup>6</sup><br>(0.38) |
| MA <sub>3</sub> Bi(I <sub>0.6</sub> Br <sub>0.4</sub> ) <sub>2.9</sub>                                     | 2D             | 2.25             | 3.6<br>(8.2)         | 0.16<br>(0.371)        | 1·10 <sup>7</sup><br>(0.371)           | -                     | -                       | -                                    | -                     | -                     | -                             |
| MA <sub>3</sub> (Bi <sub>0.6</sub> Sb <sub>0.4</sub> )(I <sub>0.6</sub> Br <sub>0.4</sub> ) <sub>2.9</sub> | 2D             | 2.23             | 55.3<br>(8.2)        | 2.4<br>(0.371)         | 1.6·10 <sup>8</sup><br>(0.371)         | 6.8<br>(48.8)         | 0.012<br>(48.8)         | 7.3·10 <sup>5</sup><br>(48.8)        | -                     | -                     | -                             |
| <b>MA<sub>3</sub>Sb(I<sub>0.6</sub>Br<sub>0.4</sub>)<sub>2.9</sub></b>                                     | <b>2D</b>      | <b>2.28</b>      | <b>315<br/>(8.2)</b> | <b>19<br/>(0.0925)</b> | <b>1.2·10<sup>9</sup><br/>(0.0925)</b> | <b>8.9<br/>(48.8)</b> | <b>0.016<br/>(48.8)</b> | <b>1.0·10<sup>6</sup><br/>(48.8)</b> | -                     | -                     | -                             |
| MA <sub>3</sub> BiBr <sub>2.9</sub>                                                                        | 2D             | 2.74             | -                    | -                      | -                                      | -                     | -                       | -                                    | -                     | -                     | -                             |
| MA <sub>3</sub> (Bi <sub>0.6</sub> Sb <sub>0.4</sub> )Br <sub>2.9</sub>                                    | 2D             | 2.71             | 6.2<br>(8.2)         | 0.17<br>(0.371)        | 1.1·10 <sup>7</sup><br>(0.371)         | -                     | -                       | -                                    | -                     | -                     | -                             |
| MA <sub>3</sub> SbBr <sub>2.9</sub>                                                                        | 2D             | 2.75             | 58.9<br>(8.2)        | 4.2<br>(0.0925)        | 2.7·10 <sup>8</sup><br>(0.0925)        | -                     | -                       | -                                    | -                     | -                     | -                             |

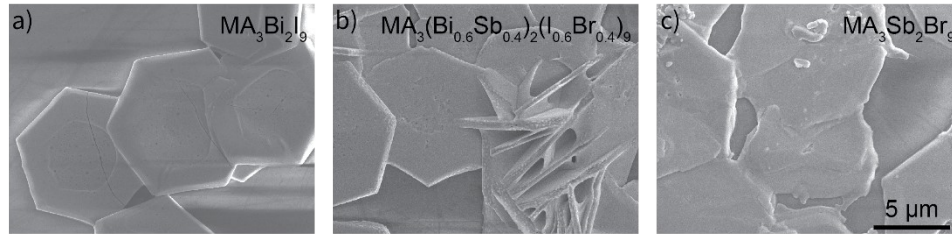

Figure S1. SEM images of 3 characteristic samples prepared on quartz showing micrometer size hexagonal grains and the resulting material exhibited the same carrier mobility but improved carrier lifetime.

Table S2. – THz measurements for 2 set of samples, prepared on quartz. (set #1 – bare perovskite solutions, #2– solutions with  $\text{NH}_4\text{SCN}$  additive).

| Sample Set #1                                                                           | THz mobility, $\text{cm}^2/\text{V/s}$ | THz lifetime, ps |
|-----------------------------------------------------------------------------------------|----------------------------------------|------------------|
| $\text{MA}_3\text{Bi}_2\text{Br}_9$ , (2D)                                              | 0.4                                    | 8.7              |
| $\text{MA}_3\text{Sb}_2\text{Br}_9$ , (2D)                                              | 0.5                                    | 4.8              |
| $\text{MA}_3(\text{Bi}_{0.6}\text{Sb}_{0.4})_2(\text{I}_{0.6}\text{Br}_{0.4})_9$ , (2D) | 0.6                                    | 6.6              |
| $\text{MA}_3\text{Bi}_2\text{I}_9$ (0D)                                                 | 0.3                                    | 2.8              |
| $\text{MA}_3\text{Sb}_2\text{I}_9$ , (0D)                                               | 0.4                                    | 1.2              |
| Sample Set #2                                                                           | THz mobility, $\text{cm}^2/\text{V/s}$ | THz lifetime, ps |
| $\text{MA}_3(\text{Bi}_{0.6}\text{Sb}_{0.4})_2(\text{I}_{0.6}\text{Br}_{0.4})_9$ , (2D) | 0.4                                    | 12               |
| $\text{MA}_3\text{Sb}_2\text{Br}_9$ , (2D)                                              | 0.4                                    | 10               |
| $\text{MA}_3\text{Bi}_2\text{I}_9$ (0D)                                                 | 0.3                                    | 9                |

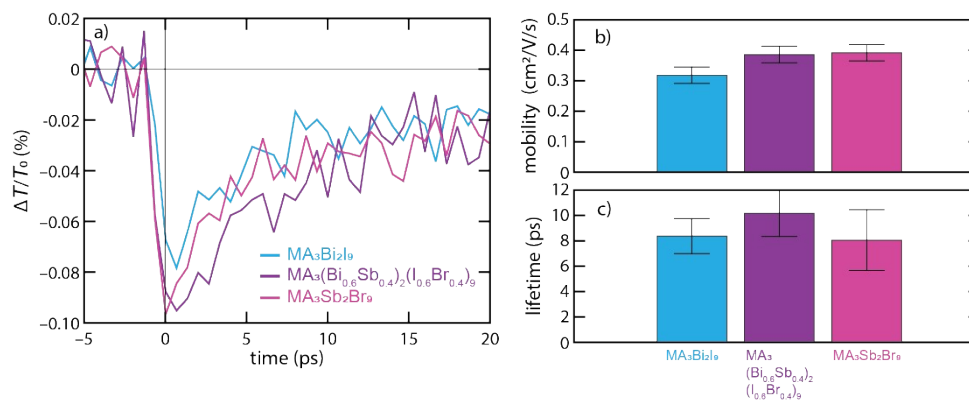

Figure S2. THz mobility and lifetime of samples prepared on quartz with the increased grain size, carrier lifetime increased to >9 ps for all samples while carrier mobilities remain the same.

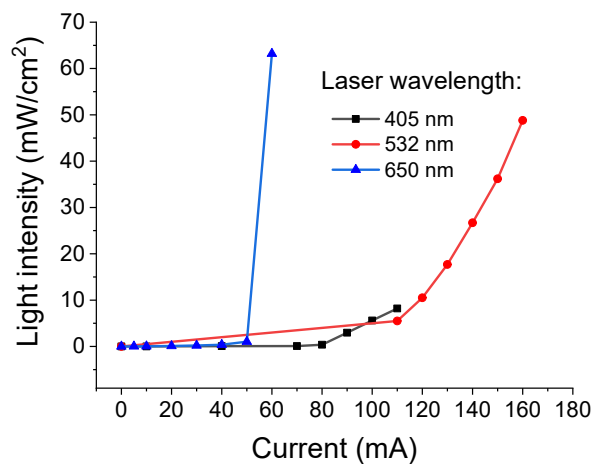

Figure S3. – Relation between laser light intensity and current

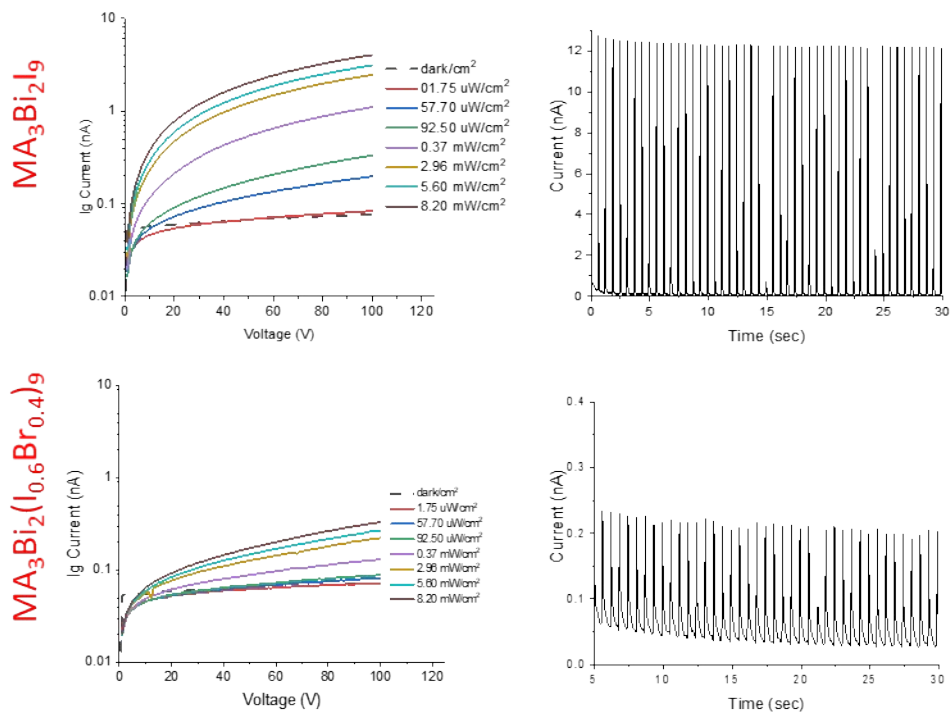

Figure S4. IV characteristics and transient photoresponse of Bi- systems ( $\text{MA}_3\text{Bi}_2\text{Br}_9$  did not respond)

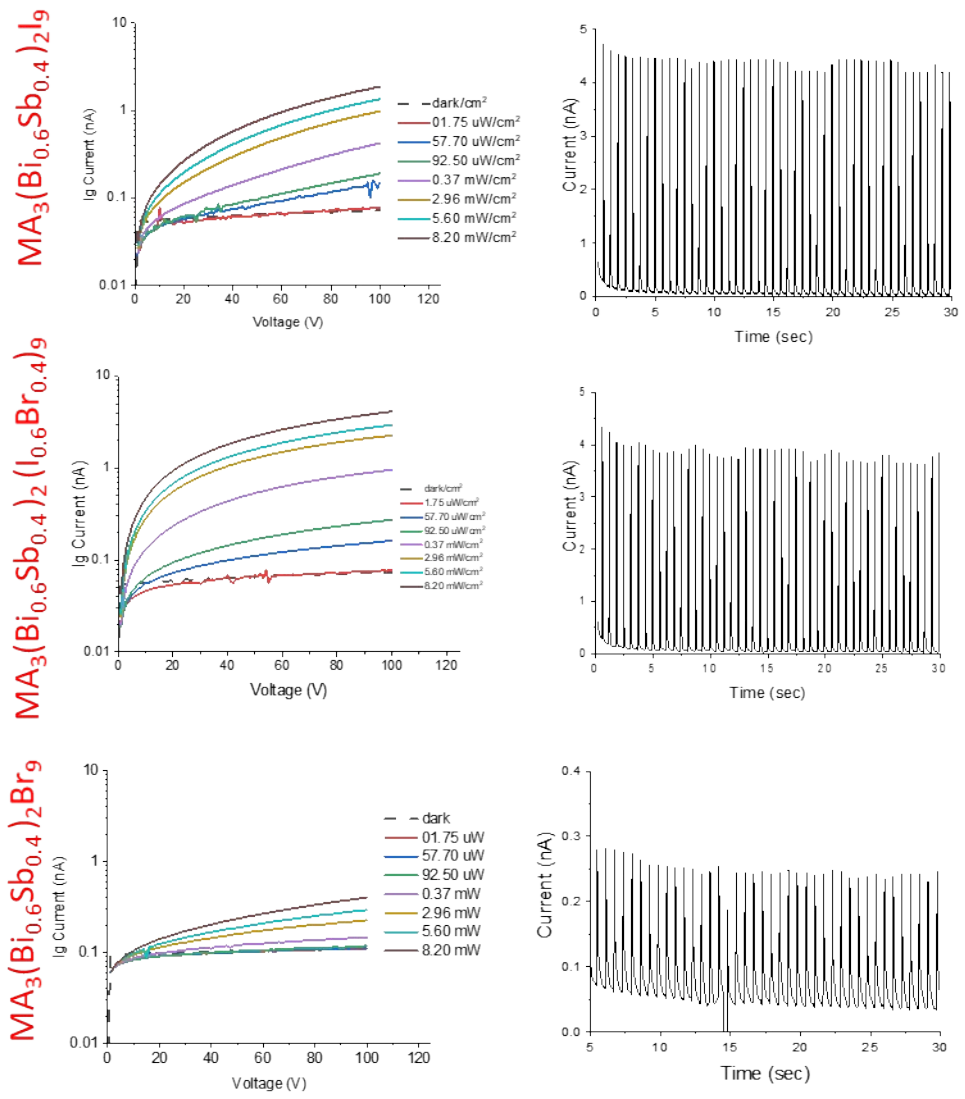

Figure S5. IV characteristics and transient photoresponse of Bi-Sb systems

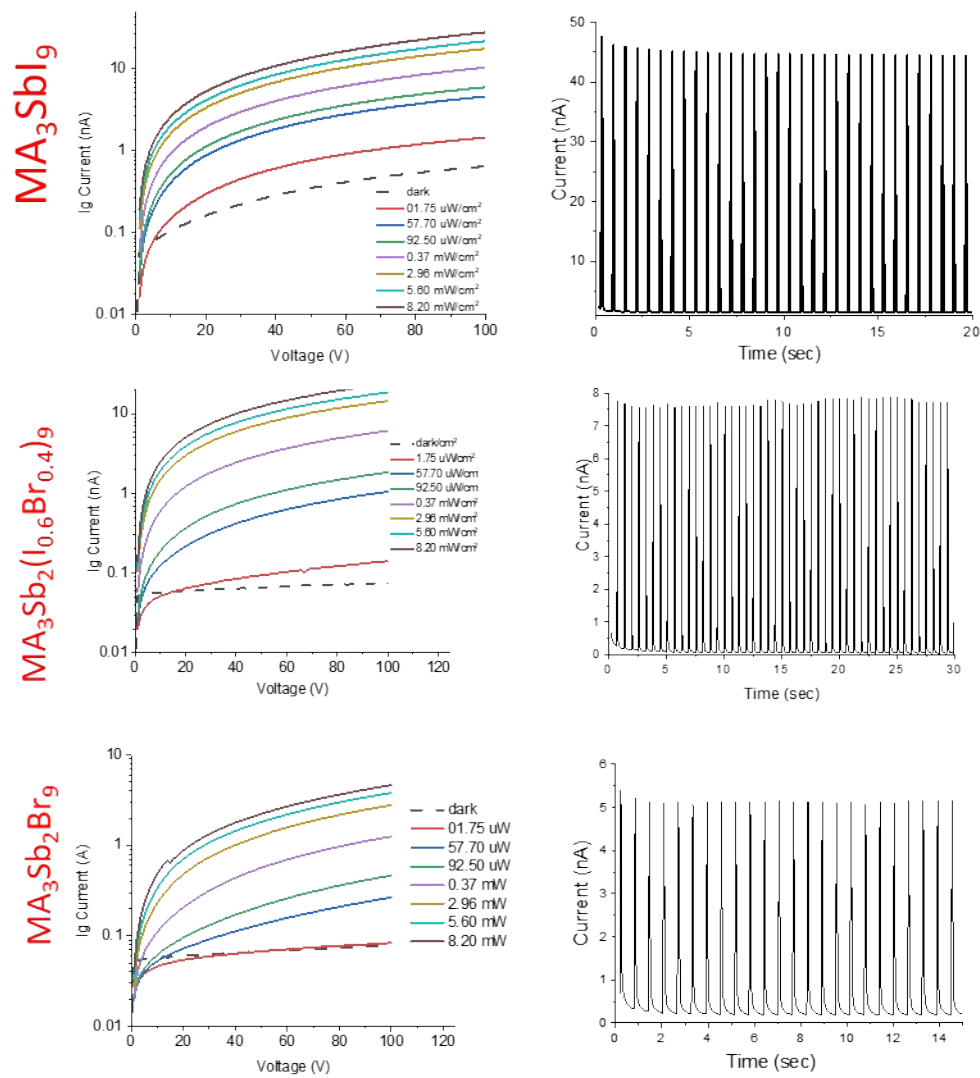

Figure S6. IV characteristics and transient photoresponse of Sb-systems

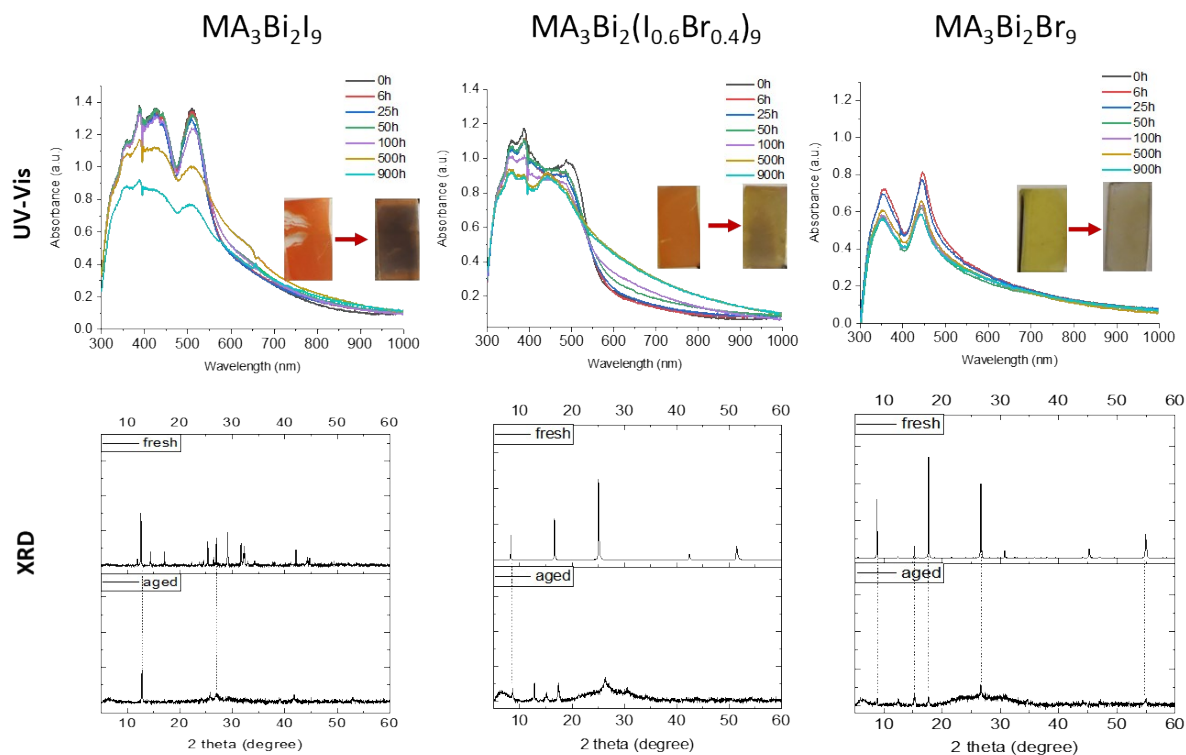

Figure S7. Change of UV-vis spectra(a) and XRD patern(b) of Bi-rich- systems.

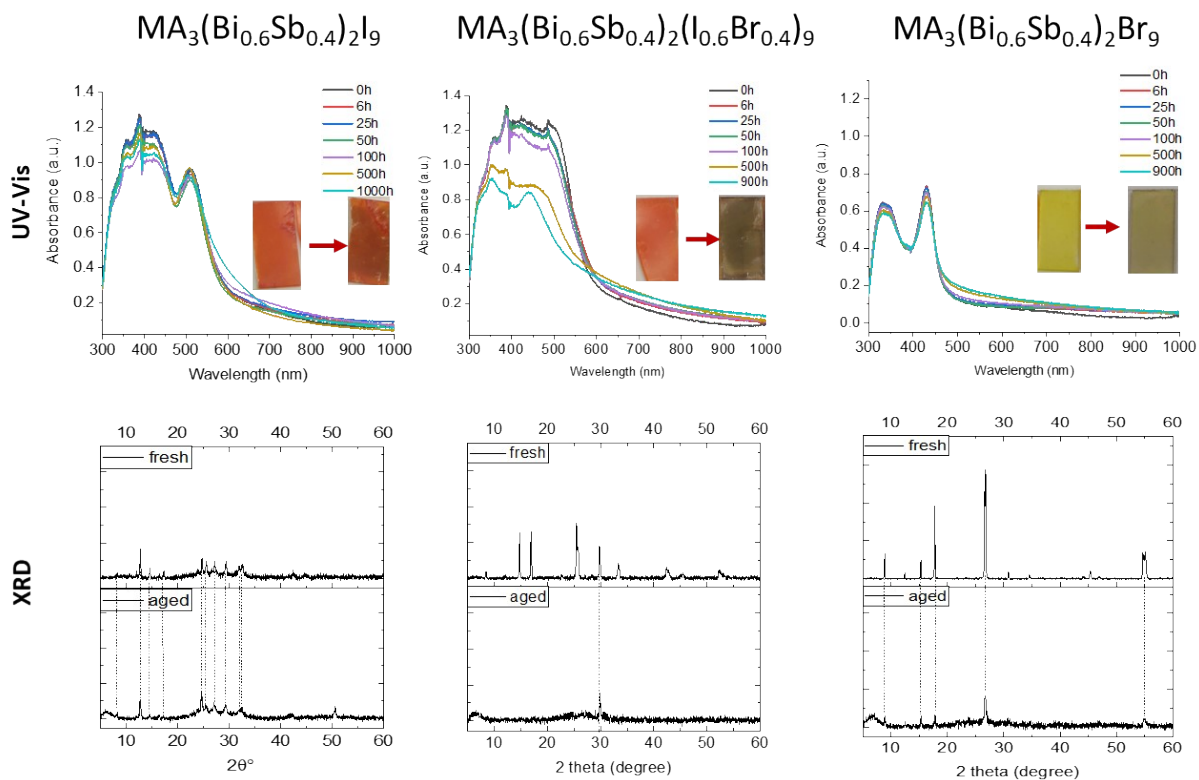

Figure S8. Change of UV-vis spectra(a) and XRD patern(b) Bi-Sb systems.

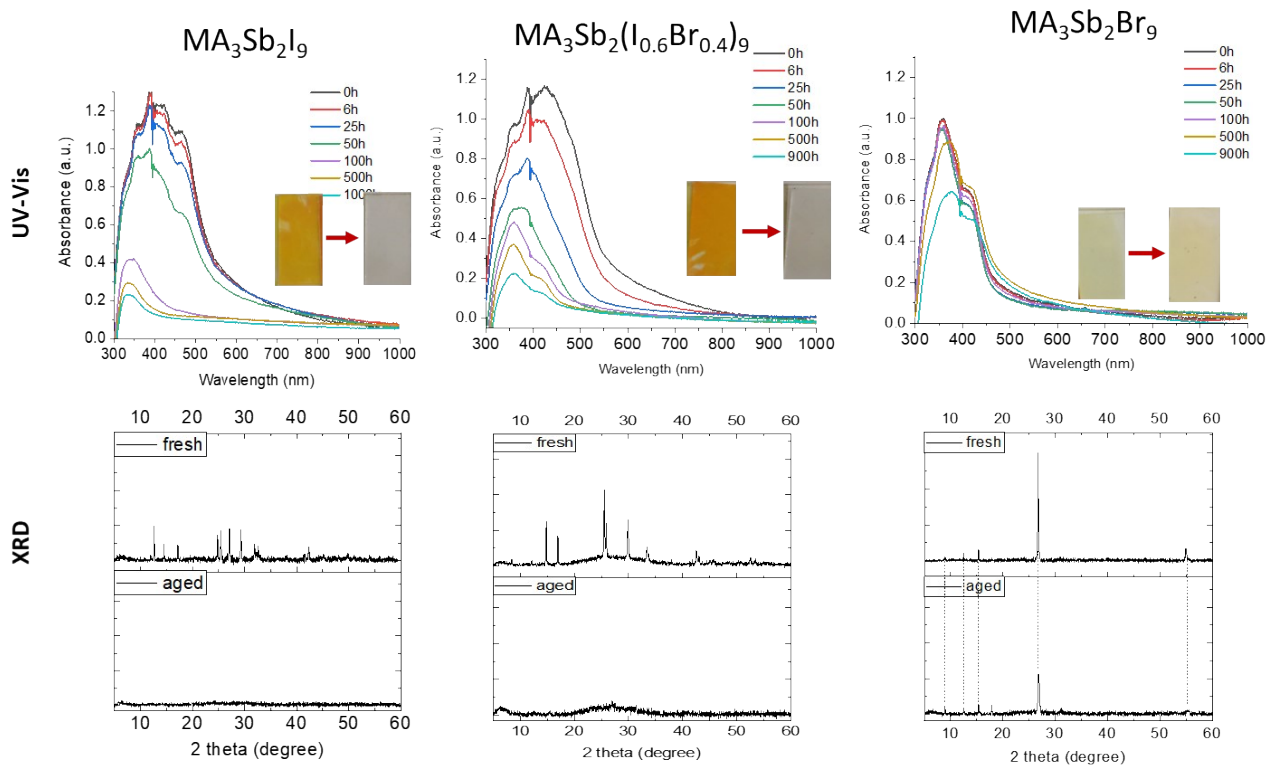

Figure S9. Change of UV-vis spectra(a) and XRD pattern(b) of Sb-rich systems.
